# Supplementary material for: Experimental and theoretical investigation of lithium-ion conductivity in Li2LaNbTiO7
Source: Royal Society of Chemistry journal article supplement (doi:10.1039/c9dt03547h), 2019-01-01
Supplement: c9dt03547h1.pdf [file c9dt03547h1.pdf]

## Supplementary Information

### Experimental and Theoretical Investigation of Lithium-Ion Mobility in $\text{Li}_2\text{LaNbTiO}_7$

Selorm Joy Fanah<sup>1</sup>, Ming Yu<sup>2</sup>, Farshid Ramezanipour<sup>1,\*</sup>

<sup>1</sup>Department of Chemistry, University of Louisville, Louisville, KY 40292, USA

<sup>2</sup>Department of Physics and Astronomy, University of Louisville, Louisville, KY 40292, USA

\*Email: [farshid.ramezanipour@louisville.edu](mailto:farshid.ramezanipour@louisville.edu), Phone: +1(502) 852-7061

ORCID iD: 0000-0003-4176-1386

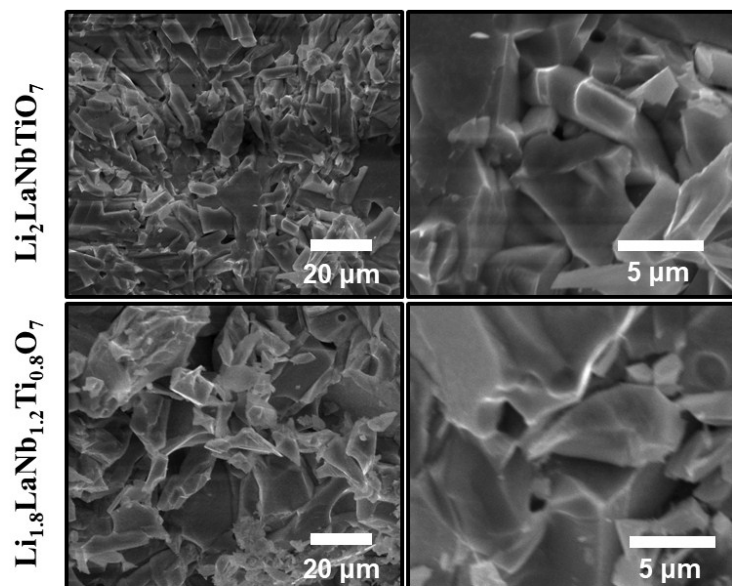

**Figure S1.** Scanning electron microscopy images of  $\text{Li}_2\text{LaNbTiO}_7$  and  $\text{Li}_{1.8}\text{LaNb}_{1.2}\text{Ti}_{0.8}\text{O}_7$ .

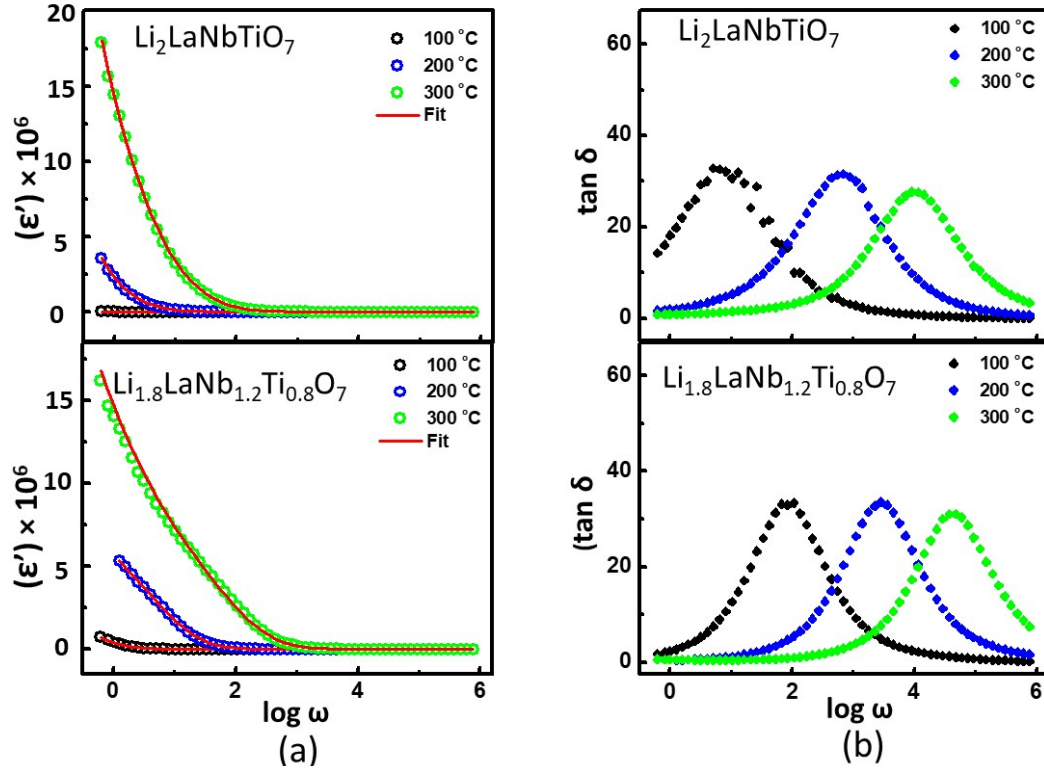

**Figure S2.** Temperature and frequency dependence of (a) dielectric constant ( $\epsilon'$ ) and (b) dielectric loss ( $\tan \delta$ ) for  $\text{Li}_2\text{LaNbTiO}_7$  and  $\text{Li}_{1.8}\text{LaNb}_{1.2}\text{Ti}_{0.8}\text{O}_7$ .

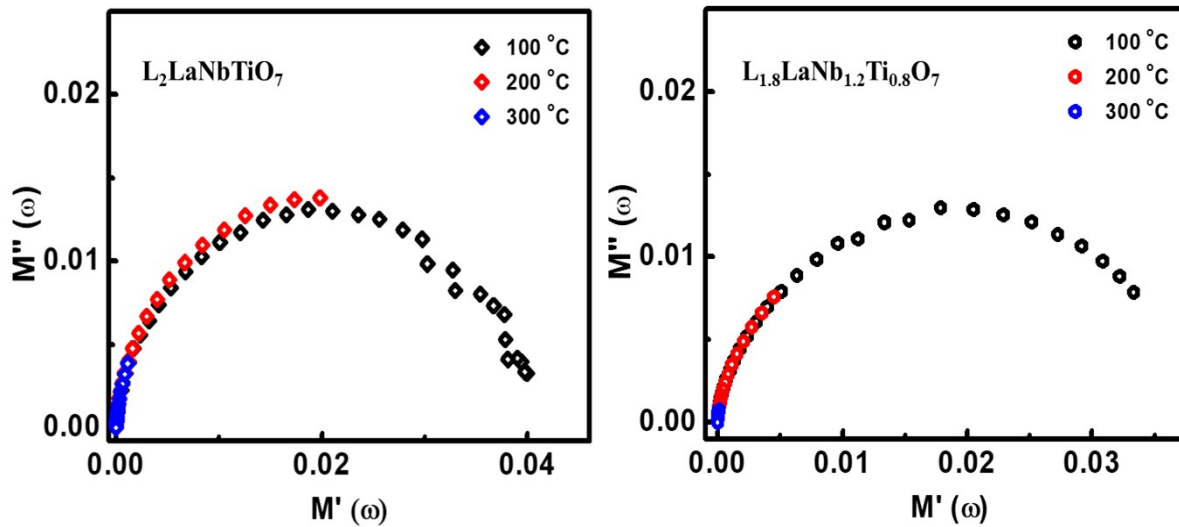

**Figure S3.** Complex Modulus Plots for  $\text{Li}_2\text{LaNbTiO}_7$  and  $\text{Li}_{1.8}\text{LaNb}_{1.2}\text{Ti}_{0.8}\text{O}_7$ .

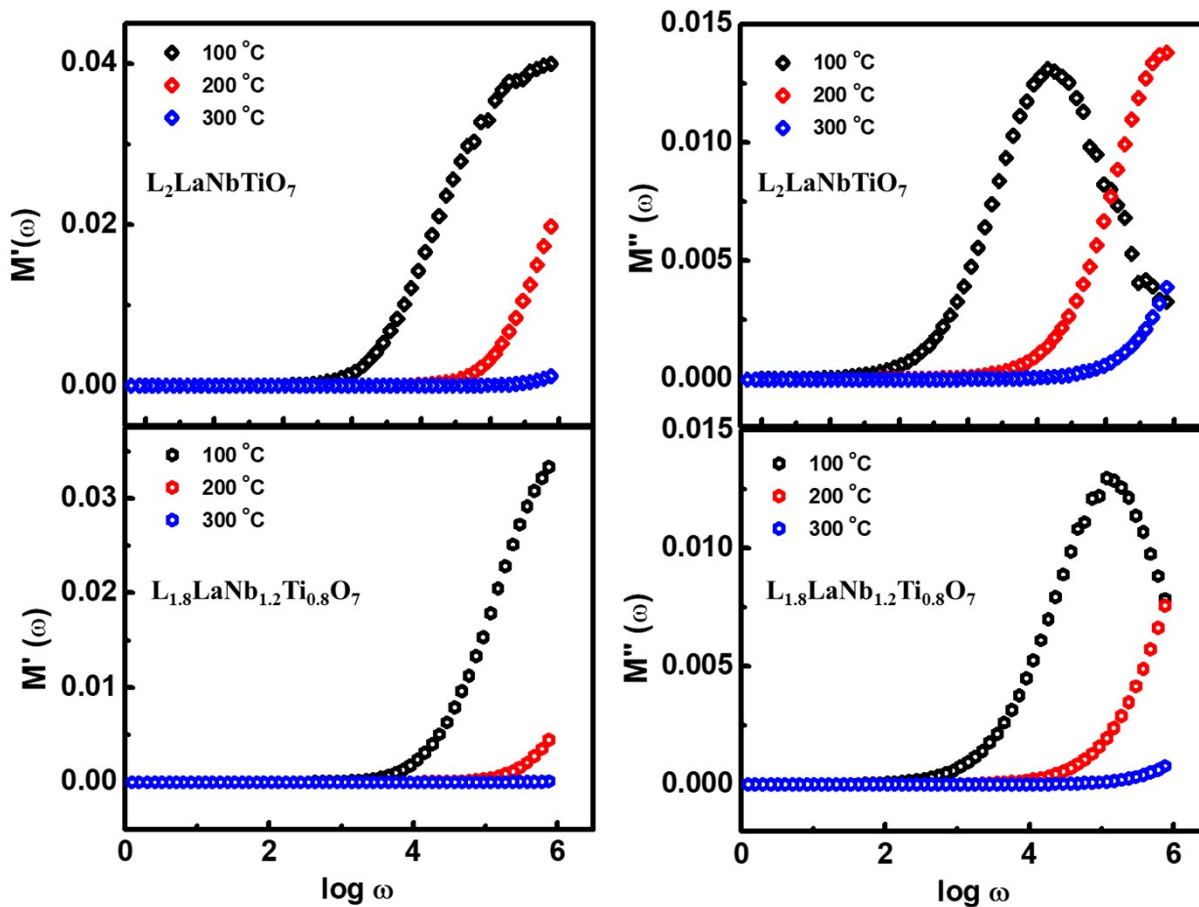

**Figure S4.** Variations of real ( $M'$ ) and imaginary ( $M''$ ) parts of Modulus with temperature over different frequency ranges for  $\text{Li}_2\text{LaNbTiO}_7$  and  $\text{Li}_{1.8}\text{LaNb}_{1.2}\text{Ti}_{0.8}\text{O}_7$ .
